# Supplementary material for: A Systematic Review and Meta-Analysis of Risk Factors for Sexual Transmission of HIV in India
Source: PubMed Central journal article supplement (PMC3429412; doi:10.1371/journal.pone.0044094), 2012-08-28
Supplement: pone.0044094.s003.pdf [file pone.0044094.s003.pdf]

Supplemental Table 1: Summary of study population characteristics.

| Study [Ref. number]       | Year of pub. | Time period of study | Exposures measured                                                         | Exposure measurement method                                                                                                                                                              | HIV method               | State    | Population type | Design | Risk group | HIV inc or prev | Sex specific estimates available? | Prev. of exposure                | Overall prev. of HIV | Study sample size | Notes on exposure measurement                                                                                                                                                                                                                                                                            |
|---------------------------|--------------|----------------------|----------------------------------------------------------------------------|------------------------------------------------------------------------------------------------------------------------------------------------------------------------------------------|--------------------------|----------|-----------------|--------|------------|-----------------|-----------------------------------|----------------------------------|----------------------|-------------------|----------------------------------------------------------------------------------------------------------------------------------------------------------------------------------------------------------------------------------------------------------------------------------------------------------|
| Becker ML [71] 2010       |              | 2004-2006            | GUD<br>HSV-2<br>Syphilis                                                   | Self-report<br>multiplex PCR if GUD; IgG ELISA<br>RPR + TPHA                                                                                                                             | 2 ELISAs                 | KN       | STI             | CS     | H          | P               | Y                                 | 34.4%<br>7.7%<br>5.3%            | 7.9%                 | 813               | Current GUD<br>Ever infection<br>Active infection                                                                                                                                                                                                                                                        |
| Becker ML [13] 2007       |              | 2003                 | Circ./Muslim<br>HSV-2<br>Sexual partners<br>Paid for sex                   | Self-report<br>IgG ELISA<br>Self-report<br>Self-report                                                                                                                                   | 2 ELISAs                 | KN       | General         | CS     | L          | P               | Y                                 | 15.9%<br>18.9%<br>7.3%<br>2.0%   | 2.9%                 | 4,008             | Religion<br>Ever infection<br>>1 in last 3 months, 12 months & lifetime<br>Ever paid or received money for sex                                                                                                                                                                                           |
| Brahme R [72] 2006        |              | 1993-2002            | Gonorrhea<br>GUD<br>Sexual partners<br><br>Syphilis                        | Gram stain + culture<br>physical exam; Self-report<br>Self-report<br><br>RPR + TPHA                                                                                                      | ELISA + Rapid test       | MH       | FSW             | CS     | H          | P               | Y                                 | 11.4%<br>13.1%                   | 54.0%                | 1,359             | Active infection<br>Diagnosis of genital ulcer; Hx of genital ulcers<br>Lifetime number of partners (1-100, 101-1000, >1000)                                                                                                                                                                             |
| Brahme RG. [73] 2005      |              | 1998-2000            | Sexual partners<br>Paid for sex                                            | Self-report                                                                                                                                                                              | ELISA + Rapid test       | MH       | STI             | CS     | H          | P               | Y                                 | 85.5%<br>9.6%                    | 22.2%                | 1,872             | Lifetime number of partners (1, 2-3, 4-10, >10)                                                                                                                                                                                                                                                          |
| Dandona L [11] 2008       |              | 2004-2005            | Circ./Muslim<br>Sexual partners                                            | Self-report<br>Self-report                                                                                                                                                               | 1 ELISA or Rapid test    | AP       | General         | CS     | L          | P               | Y                                 | 84.0%<br>29.7%                   | 1.9%                 | 12,378            | Circumcision<br>Women: >1 in lifetime; men: either >1 in lifetime, or having visited a sex worker                                                                                                                                                                                                        |
| Decker MR [74] 2009       |              | 2006                 | Circ./Muslim<br>Sexual partners                                            | Self-report<br>Self-report                                                                                                                                                               | 2 ELISAs                 | INDIA    | General         | CS     | L          | P               | Y                                 | 11.7%<br>9.9%                    | 0.3%                 | 40,762            | Religion & circumcision<br>>1 in lifetime                                                                                                                                                                                                                                                                |
| Gangakhedkar RR [75] 1997 |              | 1993-1996            | Paid for sex                                                               | Self-report                                                                                                                                                                              | ELISA, Rapid, + WB       | MH       | STI             | CS     | H          | P               | Y                                 | 57.3%                            | 34.4%                | 916               | Ever receiving money for sex, or identified occupation as SW or former SW                                                                                                                                                                                                                                |
| George S [76] 1997        |              | 1986-1993            | GUD<br>Paid for sex                                                        | Self-report<br>Self-report                                                                                                                                                               | ELISA + WB               | S. INDIA | STI             | CCTRL  | H          | P               | N                                 | 40.0%<br>81.0%                   | 50.0%                | 210               | Hx of GU<br>Sexual exposure to a CSW                                                                                                                                                                                                                                                                     |
| Kumar R [4] 2006          |              | 2000-2004            | Syphilis                                                                   | VDRL                                                                                                                                                                                     | 2 ELISAs                 | INDIA    | ANC             | CS     | L          | P               | Y                                 | 1.6%                             | 0.9%                 | 213,689           | VDRL reactive                                                                                                                                                                                                                                                                                            |
| Kumarasamy N [77] 2010    |              | 2006-2008            | Sexual partners                                                            | Self-report                                                                                                                                                                              | Rapid + WB               | AP       | STI             | CCTRL  | H          | I               | N                                 | 6.3%                             | 29.5%                | 237               | >1 in past month                                                                                                                                                                                                                                                                                         |
| Kumta S [78] 2010         |              | 2003-2004            | Sexual partners<br>Syphilis                                                | Self-report<br>VDRL                                                                                                                                                                      | 3 Rapid tests            | MH       | MSM             | CS     | H<br>H     | P               | Y                                 | 41.0%<br>6.5%                    | 12.5%                | 831               | <5, >=5 partners in past 6 months<br>VDRL reactive                                                                                                                                                                                                                                                       |
| Madhivanan P [79] 2005    |              | 2002-2003            | Circ./Muslim<br>Gonorrhea<br>HSV-2<br><br>Paid for sex<br>Syphilis         | Self-report<br>PCR; Gram stain + culture if genital ulcer<br>physical exam; IgG ELISA; multiplex PCR if<br>GUD<br><br>Self-report<br>physical exam; VDRL + TPHA; multiplex<br>PCR if GUD | ELISA + WB               | MH       | FSW clients     | CS     | H          | P               | Y                                 | 24.6%<br>7.3%<br>40.9%           | 14.0%                | 1,741             | Religion<br>Gonococcal urethritis if any are +<br>PCR, IgG ELISA and clinical diagnosis used to<br>determine incident, chronic or recurrent infection<br>Sex with an FSW in last 3 months, ever<br>Clinical diagnosis, PCR, VDRL and TPHA all used<br>to determine primary, secondary, or latent/treated |
| Manjunath JV [80] 2002    |              | 1999-2001            | Circ./Muslim<br>GUD<br><br>Sexual partners<br><br>Paid for sex<br>Syphilis | Self-report<br>Self-report; physical exam<br><br>Self-report<br><br>Self-report<br>VDRL                                                                                                  | ELISA + Rapid test       | MH       | Truckers        | CS     | H          | P               | Y                                 | 24.3%<br>31.9%                   | 16.0%                | 263               | Religion + circumcision<br>Hx in last 5 years; clinical diagnosis of ulcerative<br>STD<br>>1 (time period not specified); median number of<br>sex partners in past year given<br>Sex with CSW (time period not specified)<br>VDRL reactive                                                               |
| Mehendale SM [81] 1996    |              | 1993-1995            | Circ./Muslim<br>GUD<br>Sexual partners<br>Syphilis                         | Self-report<br>physical exam + rapid lab<br>Self-report<br>physical exam + rapid lab                                                                                                     | ELISA, Rapid, + WB       | MH       | STI             | CHRT   | H          | P               | Y                                 | 93.6%<br>50.2%<br>84.0%<br>17.0% | 21.2%                | 5,321             | Circumcised<br>Presenting genital ulcer; Hx of genital ulcer<br>lifetime partners (1, 2-9, 1-99, 100-999, >1000)<br>VDRL reactive                                                                                                                                                                        |
| Mehta SH [82] 2006        |              | 1993-2002            | Circ./Muslim<br>GUD<br><br>Sexual partners<br>Syphilis                     | Self-report<br>Self-report; phys. Exam. + Gram stain, wet<br>mount, dark ground micr.<br><br>Self-report<br>VDRL/RPR + TPHA                                                              | ELISA + Rapid test       | MH       | STI             | CS     | H          | P               | Y                                 | 7.0%<br>25.0%                    | 21.0%                | 1,020             | Hx of genital ulcer; genital ulcer on exam<br><br>Lifetime partners (1, 2-9, >10)<br>VDRL or RPR +, & TPHA +                                                                                                                                                                                             |
| Mishra S [5] 2009         |              | 2004-2006            | gonorrhea<br>GUD<br>HSV-2<br>Syphilis                                      | PCR<br>Self-report<br>2 ELISAs (IgG)<br>RPR + TPHA                                                                                                                                       | ELISA + Rapid test       | KN       | FSW             | CS     | H          | P               | Y                                 | 3.6%<br>7.7%<br>67.8%<br>25.3%   | 18.2%                | 2,208             | PCR +<br>Genital ulcer within last 12 months<br><br>Active if both +; lifetime if TPHA +                                                                                                                                                                                                                 |
| Mukhopadhyay S [83] 2010  |              | 2005-2006            | Circ./Muslim                                                               | Self-report                                                                                                                                                                              | 3 Rapid tests            | WB       | STI             | CS     | H          | P               | N                                 | 26.3%                            | 13.9%                | 1,151             | Religion                                                                                                                                                                                                                                                                                                 |
| Munro HL [12] 2008        |              | 2005-2006            | Circ./Muslim<br>GUD<br>Sexual partners<br>Paid for sex                     | Self-report<br>Self-report<br>Self-report<br>Self-report                                                                                                                                 | 2 ELISA tests/ELISA + WB | KN       | General         | CS     | L          | P               | Y                                 | 10.1%<br>1.5%<br>4.3%<br>2.2%    | 0.8%                 | 4,190             | Religion + circumcision<br>Ever Hx of genital ulcer<br>Lifetime partners (0, 1, >1)<br>Paid for or received money for sex                                                                                                                                                                                |

| Study [Ref. number] | Year of pub. | Time period of study | Exposures measured<br>Syphilis                              | Exposure measurement method<br>RPR + TPHA                 | HIV method                           | State   | Population type | Design | Risk group | HIV inc or prev | Sex specific estimates available? | Prev. of exposure 1.5%          | Overall prev. of HIV | Study sample size | Notes on exposure measurement<br>Active infection (RPR+ & TPHA +)                                                                                     |
|---------------------|--------------|----------------------|-------------------------------------------------------------|-----------------------------------------------------------|--------------------------------------|---------|-----------------|--------|------------|-----------------|-----------------------------------|---------------------------------|----------------------|-------------------|-------------------------------------------------------------------------------------------------------------------------------------------------------|
| Nag VL [84]         | 2009         | 2004                 | Syphilis                                                    | VDRL + TPHA                                               | ELISA + Rapid test                   | UP      | STI             | CS     | H          | P               | N                                 | 3.2%                            | 22.3%                | 220               | VDRL reactive; VDRL+ & TPHA+ reactive                                                                                                                 |
| Jindal N [85]       | 2007         | 2005                 | Sexual partners                                             | Self-report                                               | ELISA + Rapid test                   | PJ      | STI             | CS     | H          | P               | Y                                 | 93.2%                           |                      | 280               | Hx of multiple sex partners (lifetime)                                                                                                                |
| NFHS-3 [64]         | 2006         | 2006                 | Circ./Muslim<br>GUD<br>Sexual partners<br>Paid for sex      | Self-report<br>Self-report<br>Self-report<br>Self-report  | 2 ELISAs                             | INDIA   | General         | CS     | L          | P               | Y                                 | 12.9%<br>8.7%<br>9.4%<br>1.1%   | 0.3%                 | 99,838            | Religion<br>Genital ulcer symptoms in past 12 months<br>Lifetime sexual partners (1, 2-4, >5)                                                         |
| Panda S [86]        | 2005         | 2003                 | Paid for sex                                                | Self-report                                               | 2 ELISAs                             | TN      | IDU             | CS     | H          | P               | Y                                 | 60.6%                           | 30.1%                | 226               | Ever had sex with FSW                                                                                                                                 |
| Ramesh BM [87]      | 2008         | 2003                 | Sexual partners                                             | Self-report                                               | 2 ELISAs                             | S.INDIA | FSW             | CS     | H          | P               | Y                                 | 33.1%                           | 14.6%                | 10,096            | Client volume per week (<10, >=10)                                                                                                                    |
| Reynolds SJ [10]    | 2003         | 1993-2000            | HSV-2<br>Paid for sex                                       | IgG ELISA<br>Self-report                                  | ELISA + Rapid test                   | MH      | STI             | CHRT   | H          | I               | N                                 | 43.0%                           | 8.2%                 | 2,732             | Incident if enrolled sero- & sero+ at follow up<br>CSW partners in past 3 mo.; FSW risk group                                                         |
| Reynolds SJ [7]     | 2006         | 1993-2000            | Syphilis                                                    | RPR + TPHA; dark field microscopy if GUD                  | ELISA + Rapid test                   | MH      | STI             | CHRT   | H          | I               | N                                 | 14.8%                           | 8.2%                 | 2,729             | Incident if TPHA seroconversion, or GUD + (dark field microscopy/RPR seroconversion)                                                                  |
| Rodrigues JJ [88]   | 1995         | 1993-1994            | GUD                                                         | physical exam + Self-report                               | ELISA, Rapid, + WB                   | MH      | STI             | CS     | H          | P               | N                                 | 52.7%                           | 23.5%                | 2,790             | Current genital ulcer; Hx of genital ulcer                                                                                                            |
| Samuel NM [89]      | 2007         | 2003-2004            | Circ./Muslim                                                | Self-report                                               | ELISA, Rapid, + WB                   | TN      | ANC             | CS     | L          | P               | Y                                 | 3.8%                            | 2.0%                 | 3,715             | Religion                                                                                                                                              |
| Sarkar K [90]       | 2006         | 2004                 | Sexual partners<br>syphilis                                 | Self-report<br>TPHA + VDRL                                | ELISA + Rapid test                   | WB      | FSW             | CS     | H          | P               | Y                                 | 18.8%<br>13.6%                  | 5.9%                 | 2,076             | >3 clients per day<br>Recent infection if TPHA & VDRL +                                                                                               |
| Schneider JA [91]   | 2010         | 2004-2005            | HSV-2<br>Syphilis                                           | 2 ELISAs (IgG)<br>2 ELISAs (IgG)                          | ELISA, WB, p24 + pooled nucleic acid | AP      | General         | CS     | L          | P               | Y                                 | 7.5%<br>1.7%                    | 1.9%                 | 12,617            | Lifetime infection<br>Lifetime infection                                                                                                              |
| Shahmanesh M [92]   | 2009         | 2004                 | GUD<br>HSV-2<br>Sexual partners<br>Syphilis                 | Self-report<br>IgG ELISA<br>Self-report                   | 2 ELISAs                             | GOA     | FSW             | CS     | H          | P               | Y                                 | 7.4%<br>56.6%<br>62.2%<br>25.8% | 23.7%                | 325               | GUD in last 3 months<br>Lifetime infection<br>Number of clients in past week (0, 1-7, 7+);<br>number of intimate non-paying partners (0, 1, >1)       |
| Shepherd ME [93]    | 2003         | 1993-2000            | Sexual partners<br>Paid for sex                             | Self-report<br>Self-report                                | ELISA + Rapid                        | MH      | STI             | CHRT   | H          | I               | Y                                 | 14.0%<br>23.0%                  | 7.3%                 | 2,255             | Number of 'recent' partners (0, 1, >2)<br>Recent CSW partner                                                                                          |
| Shethwala N [94]    | 2009         | 2005-2006            | Syphilis                                                    | RPR + TPHA                                                | ELISA + Rapid                        | GJ      | FSW             | CS     | H          | P               | Y                                 | 11.7%                           | 11.7%                | 300               | RPR+ & TPHA+                                                                                                                                          |
| Solomon S [96]      | 2010         | 2008                 | HSV-2<br>Syphilis                                           | IgG ELISA<br>RPR + TPPA                                   | 2 ELISAs                             | TN      | MSM             | CS     | H          | P               | Y                                 | 25.8%<br>8.0%                   | 9.0%                 | 721               | lifetime infection<br>RPR & TPPA +                                                                                                                    |
| Solomon S [95]      | 1998         | 1994-1995            | GUD<br>Sexual partners<br>Syphilis                          | Self-report<br>Self-report<br>VDRL                        | ELISA + WB                           | TN      | General         | CS     | L          | P               | N                                 | 34.7%<br>48.3%<br>5.1%          | 7.3%                 | 2,063             | Hx of GUD<br>single partner vs multipartner<br>VDRL test                                                                                              |
| Talukdar A [16]     | 2007         | 2006                 | Circ./Muslim<br>Sexual partners<br>Paid for sex<br>Syphilis | Self-report<br>Self-report<br>Self-report<br>TRUST + TPHA | 3 Rapid ELISAs                       | WB      | Homeless        | CS     | H          | P               | Y                                 | 22.0%<br>90.3%<br>73.4%<br>7.1% | 3.5%                 | 485               | Religion<br>multiple sexual partners (time period not specified)<br>visited CSW in past 6 months<br>TRUST (toluidine red unheated serum test) & TPHA+ |

Footnote:

Circ./Muslim=male circumcision or Muslim religion; HSV-2=Herpes Simplex Virus 2; State: KN=Karnataka, MH=Maharashtra, AP=Andhra Pradesh, S.India= South India; Population type: STI=Sexually transmitted infection clinic attendees; General=general population survey, FSW=female sex worker, MSM=Men who have sex with men, ANC=antenatal clinic attendees, IDU=injecting drug users; Design: CS=cross-sectional, CHRT=cohort, CTRL=Case-control; HIV risk group: H=high, L=low (see methods).
